# Supplementary material for: Canonical non-homologous end-joining promotes genome mutagenesis and translocations induced by transcription-associated DNA topoisomerase 2 activity
Source: PubMed Central journal article supplement — Nucleic Acids Res. 2020 Aug 4;48(16):9147–60. doi: 10.1093/nar/gkaa640 (PMC7498328; doi:10.1093/nar/gkaa640), 2020-08-04
Supplement: gkaa640_supplemental_file.pdf [file gkaa640_supplemental_file.pdf]

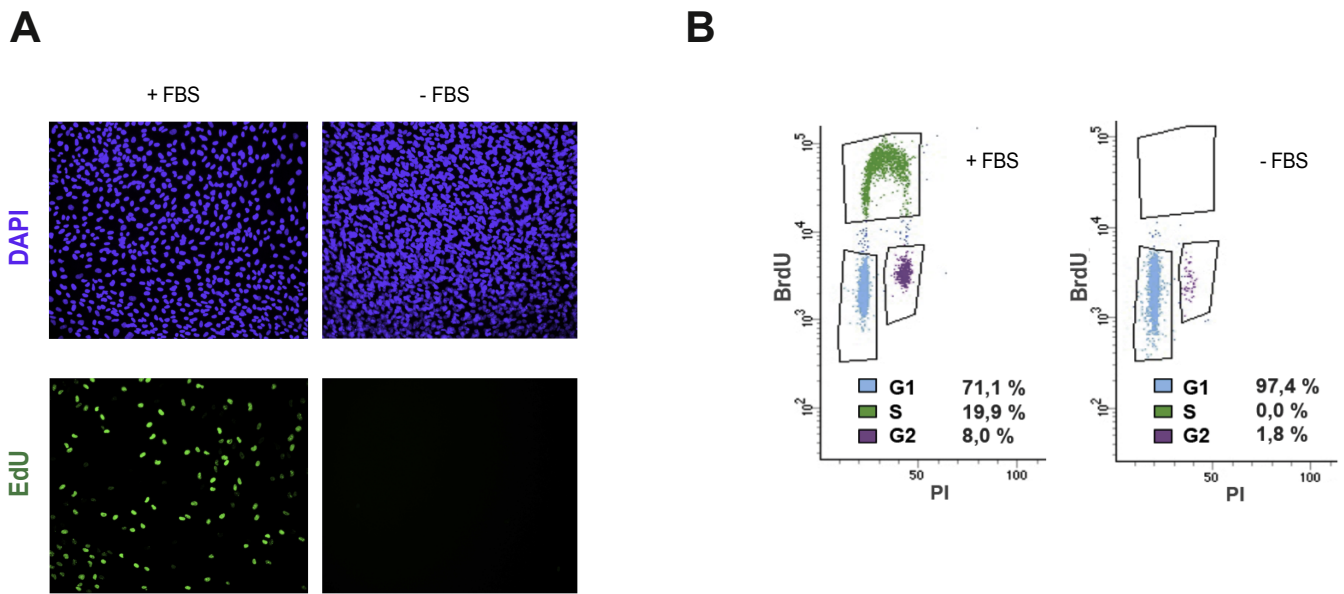

**Figure S1.** Serum-starved confluent RPE-1 cells synchronised in G0/G1. **(A)** Representative images of 5-Ethynyl-2'-deoxyuridine (EdU) pulse labelling in RPE-1 cells. Left, proliferating cells (+FBS). Right, serum-starved (-FBS) confluent cells. EdU (green) and DAPI counterstain (blue) are shown. **(B)** RPE-1 cells were stained for incorporated BrdU against total DNA content using Propidium Iodide (PI). Left, proliferating cells in presence of serum (+FBS). Right, serum-starved (-FBS) confluent cells. The percentage of each phase is indicated.

**A**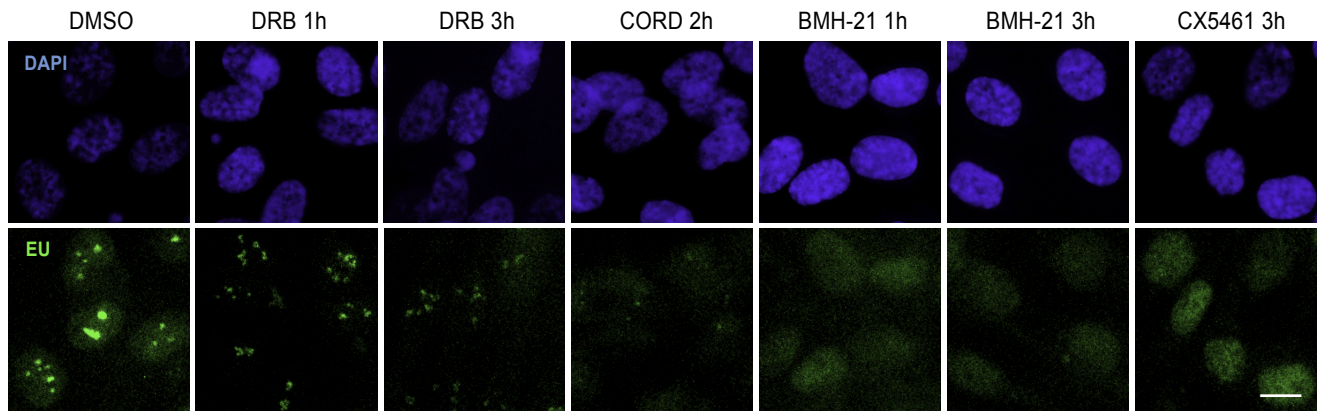**B**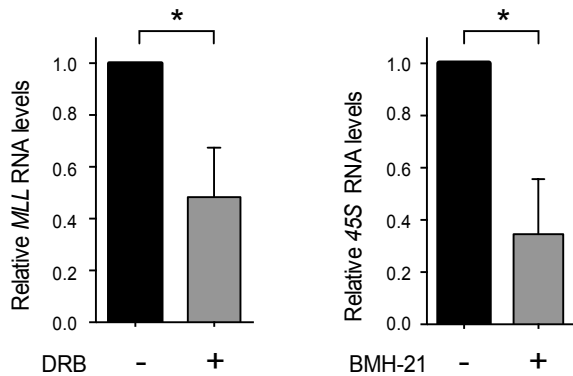

**Figure S2.** Transcription inhibition in RPE-1 cells. **(A)** Representative images of 5-Ethynyl Uridine (EU) pulse labelling in serum-starved RPE-1 cells after the indicated mock-treatment (DMSO) or treatment with 1 or 3 h with 100  $\mu$ M DRB, 2 h with 100  $\mu$ M cordycepin (CORD), 1 or 3 h with 100  $\mu$ M BMH21, or 3 h with 20  $\mu$ M CX5461. EU (green) and DAPI counterstain (blue) are shown. **(B) Left,** *MLL* (RNA polymerase II-transcribed gene) mRNA levels in serum-starved RPE-1 cells following mock-treatment (DMSO) or treatment with 100  $\mu$ M DRB for 3 h. **Right,** 45S (RNA polymerase I-transcribed rDNA) RNA levels in serum-starved RPE-1 cells following mock-treatment or treatment with 2  $\mu$ M BMH21 for 3 h. In all cases, RNA levels were quantified by qRT-PCR, normalized against 18S and then made relative to the mock-treated condition. Data are the mean ( $\pm$  s.e.m) of four independent experiments. Statistical significance was determined by *t*-tests (\* $P$ <0.05).

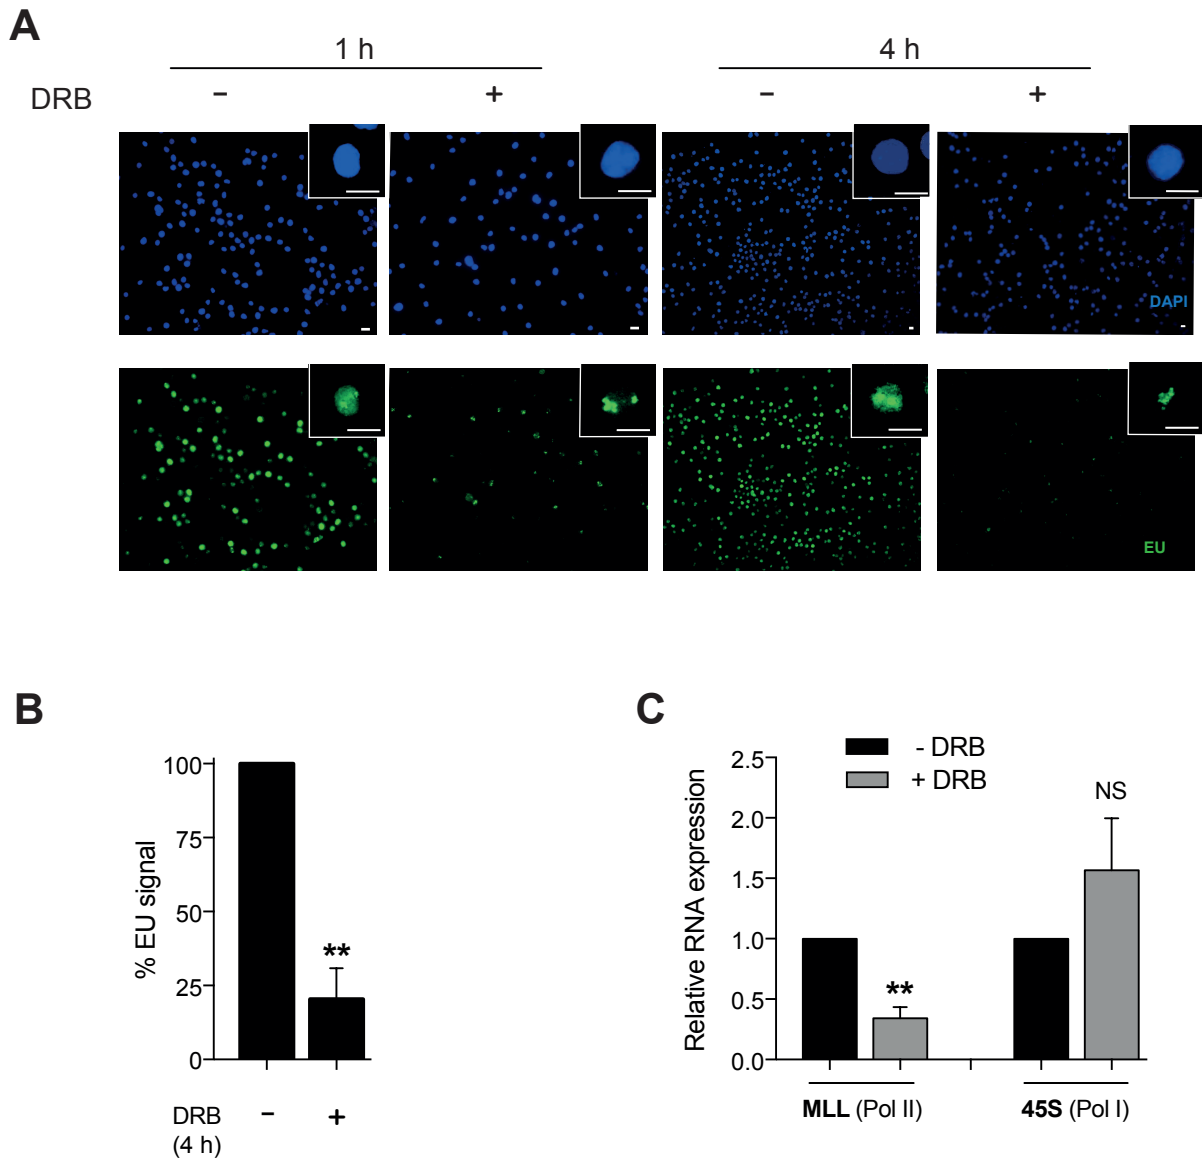

**Figure S3.** Transcription inhibition in KG1a cells. **(A)** Representative images of 5-Ethynyl Uridine (EU) pulse labelling in proliferating KG1a cells after treatment with 1 or 4 h with 100  $\mu$ M DRB or vehicle. EU (green) and DAPI counterstain (blue) are shown. Scale bar, 10  $\mu$ m. **(B)** Quantification of EU signal at 4 h DRB treatment (mean  $\pm$  s.e.m.) of three independent experiments. Statistical significance was measured by *t*-test (\*\* $P$ <0.01). **(C)** Analysis of *MLL* (RNA polymerase II-transcribed gene) and 45S (RNA polymerase I-transcribed rDNA) mRNA levels in KG1a cells treated with 100  $\mu$ M DRB for 4 h. In all cases, RNA levels were quantified by qRT-PCR, normalized against 18S expression and then made relative to the mock-treated condition. Data are the mean ( $\pm$  s.e.m.) of three independent experiments. Statistical significance was measured by *t*-test (\*\* $P$ <0.01, NS, not significant).

**A**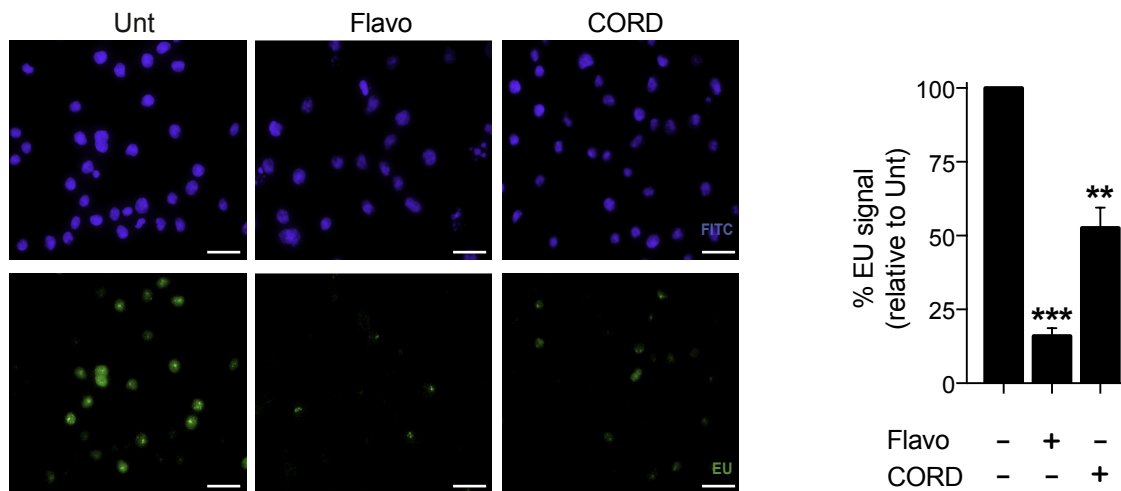**B**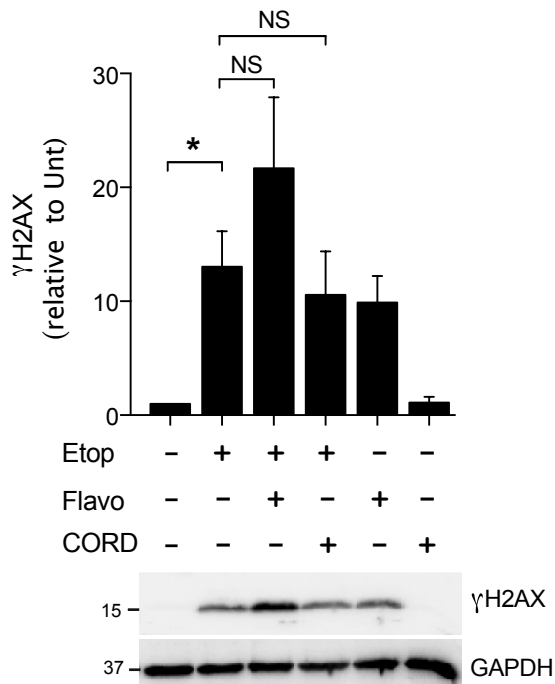**C**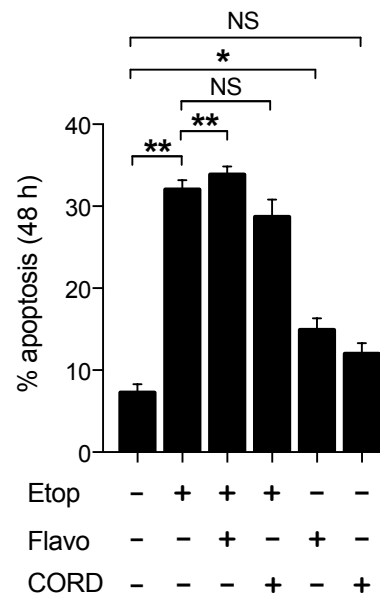

**Figure S4.** Effect of RNA Pol II inhibitors on etoposide survival in cycling cells **(A)** Representative images of 5-Ethynyl Uridine (EU) pulse labelling in proliferating KG1a cells after treatment with 500  $\mu$ M flavopiridol or 100  $\mu$ M cordycepin for 2 h. Left, representative images of EU (green) and DAPI counterstain (blue). Scale bar, 10  $\mu$ M. Right, quantification of EU signal (mean  $\pm$  s.e.m.) of three independent experiments. Statistical significance was measured by *t*-test (\*\* $P$ <0.01, \*\*\* $P$ <0.001). **(B)** Protein blots showing  $\gamma$ H2Ax and GAPDH in KG1a cells treated with 40  $\mu$ M etoposide for 3 h. Where indicated, cells were pre-incubated with flavopiridol (500  $\mu$ M) or cordycepin (100  $\mu$ M) for 2 h, prior etoposide treatment. Representative images and quantification (mean  $\pm$  s.e.m.) of three independent experiments.  $\gamma$ H2Ax protein level was normalized to GAPDH. Statistical significance was measured by *t*-test (\* $P$ <0.05, NS, not significant). Molecular weight markers are in kDa. **(C)** FACS apoptosis analysis of KG1a cell line treated with 40  $\mu$ M etoposide for 3 h. Where indicated, cells were pre-incubated with flavopiridol or cordycepin as in (B). Cells were incubated in drug-free medium for 48 h. Plot shows Annexin-V positive cells percentage (mean  $\pm$  s.e.m.) of three independent experiments at 48 h. Statistical significance was determined by *t*-test (\* $P$ <0.05, \*\* $P$ <0.01, NS, not significant).

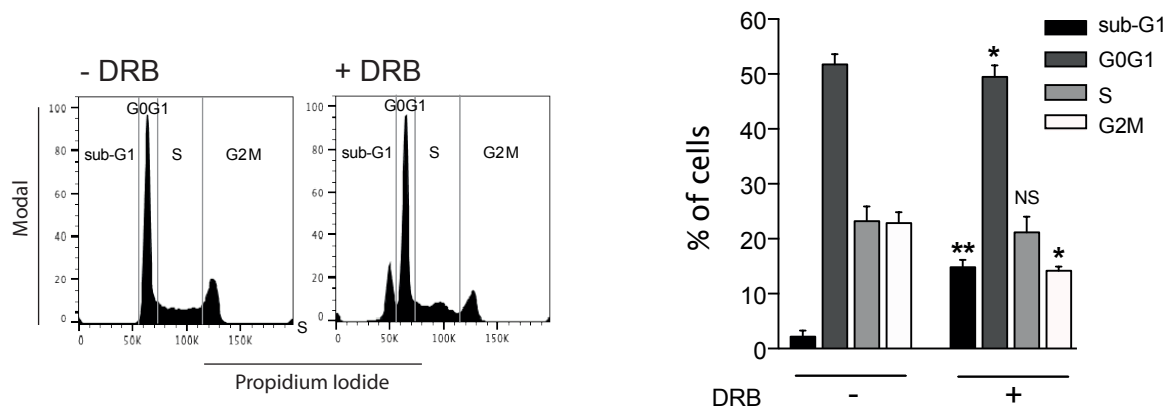

**Figure S5.** Cell cycle analysis of KG1a cells. Cell cycle analysis of proliferating KG1a cells after 4 h of 100  $\mu$ M DRB by FACS. Left, histograms of cell cycle phases according to PI staining of untreated and DRB treated cells. Right, quantification (mean  $\pm$  s.e.m.) of at least three independent experiments. Data shows percentage of cells in each cell cycle phase. Statistical significance was measured by *t*-test (\* $P$ <0.05, \*\* $P$ <0.01, NS, not significant).

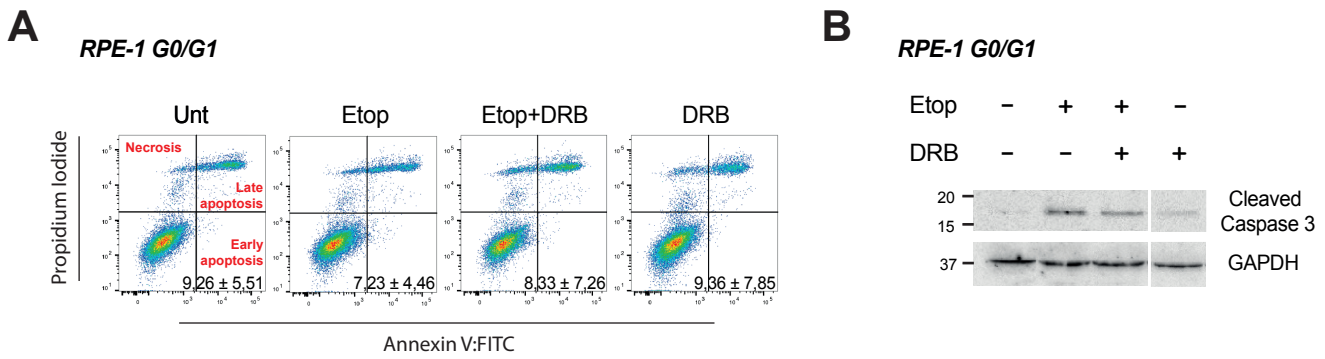

**Figure S6.** Etoposide-induced apoptosis is independent of transcription. **(A)** Apoptosis analysis by FACS of serum starved RPE-1 cells treated with 40  $\mu$ M etoposide for 3 h. Cells were pre-incubated with 100  $\mu$ M DRB for 1 h prior etoposide treatment. Following trypsinization, cells were cultured in serum containing drug-free medium for 48 h. Representative dot-plots (Annexin-V vs. Propidium Iodide) and Annexin-V positive cells percentage mean ( $\pm$  s.e.m.) of three independent experiments. Statistical significance was determined by T-test. Not significant differences were observed between conditions. **(B)** Protein blots of cleaved Caspase-3 in serum starved RPE-1 cells treated as in (A). Vinculin was used as a loading control. Molecular weight markers are in kDa.

**A**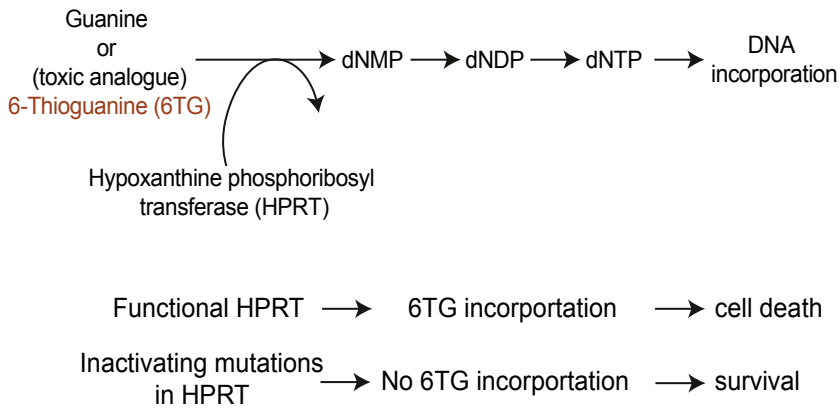**B**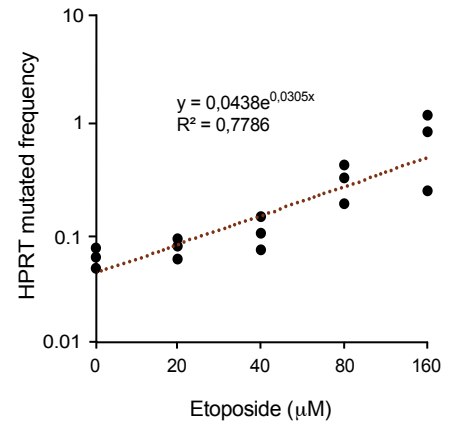**C**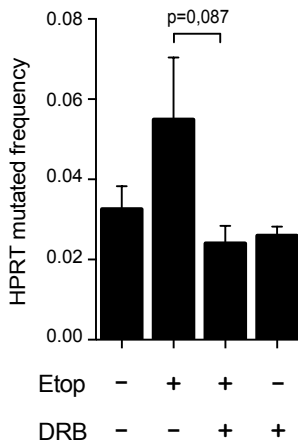

**Figure S7.** HPRT mutagenic assay. **(A)** Model for 6TG incorporation into DNA. **(B)** HPRT mutagenic assay in proliferating KG1a cells. Cells were treated with indicated concentrations of etoposide for 3h. Cells were cultured in 6TG containing drug-free medium for 10 days. Graph shows 6TG total cells with respect to the survival in a 6TG-free culture of three independent experiments. **(C)** HPRT mutagenic assay in serum-starved RPE-1 cell line. G0/G1 cells were treated with 40  $\mu\text{M}$  etoposide 3h. Where indicated, cells were pre-incubated with 100  $\mu\text{M}$  DRB for 1 h, prior etoposide. Cells were cultured in 6TG containing drug-free medium for 10 days. Other details as in B.

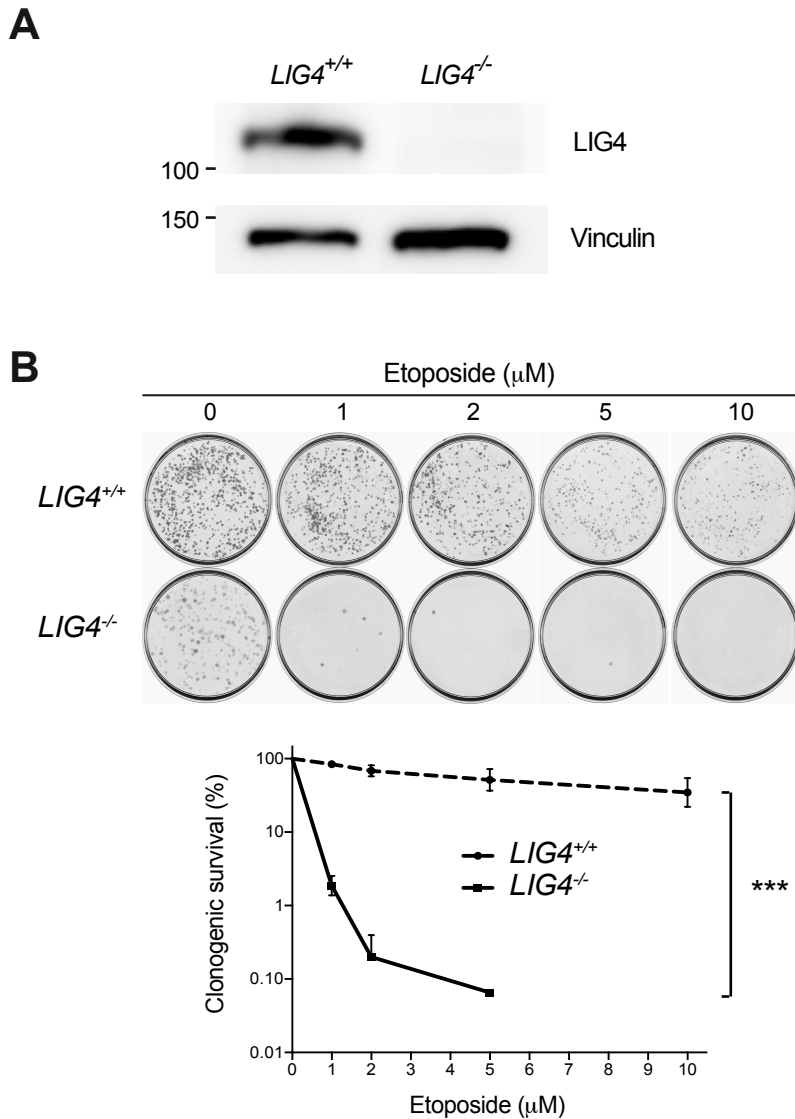

**Figure S8.** *LIG4*<sup>-/-</sup> RPE-1 cells. **(A)** LIG4 western blot in wild-type (*LIG4*<sup>+/+</sup>) and *LIG4*<sup>-/-</sup> RPE-1 cells. Vinculin was used as loading control. **(B)** Clonogenic survival of wild-type and *LIG4*<sup>-/-</sup> RPE-1 cells following treatment (3 h) with the indicated concentrations of etoposide. Data are the mean ( $\pm$ s.e.m.) of three independent experiments. Statistical significance was determined by two-way ANOVA ( $***P < 0.005$ ).



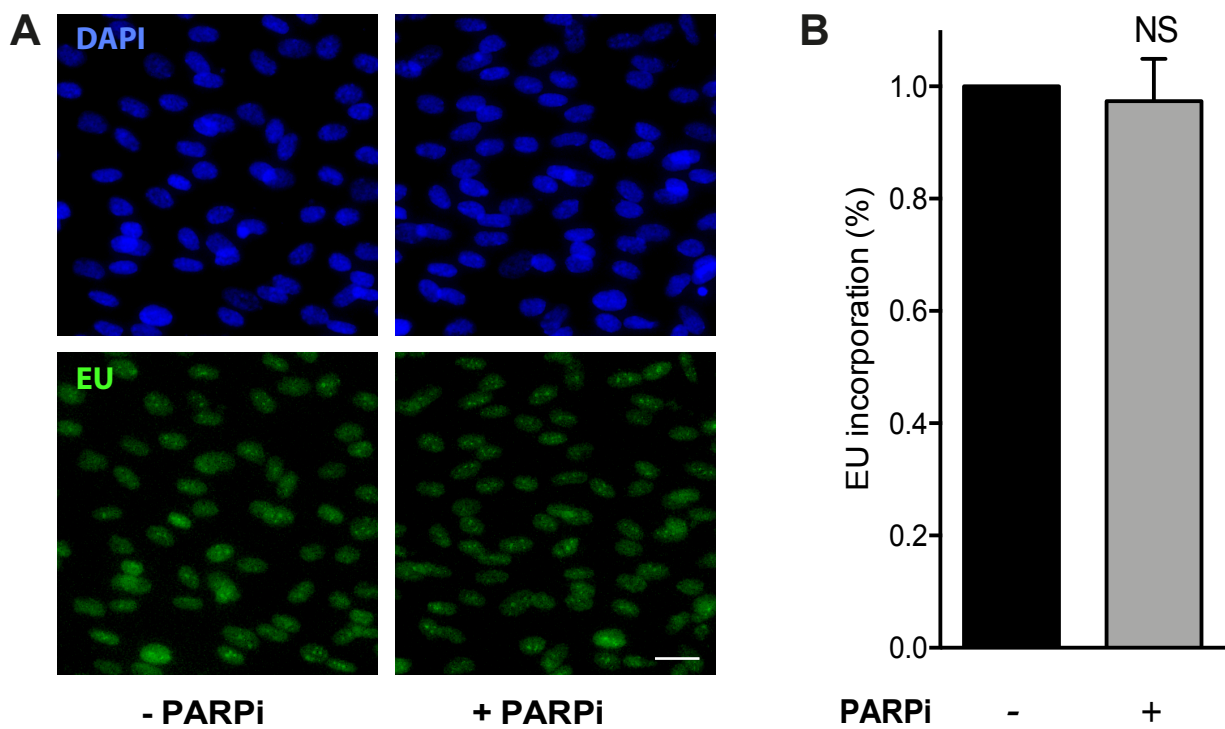

**Figure S9.** Transcription inhibition in RPE-1 cells. **(A)** Representative images of 5-Ethynyl Uridine (EU) pulse labelling in RPE-1 cells after treatment with PARP inhibitor KU58948 (1  $\mu$ M) for 1h. EU (green) and DAPI counterstain (blue) are shown. Scale bar, 10 $\mu$ m. **(B)** Quantification of EU signal (mean  $\pm$  s.e.m.) of three independent experiments. Statistical significance was measured by *t*-test ( NS, not significant).

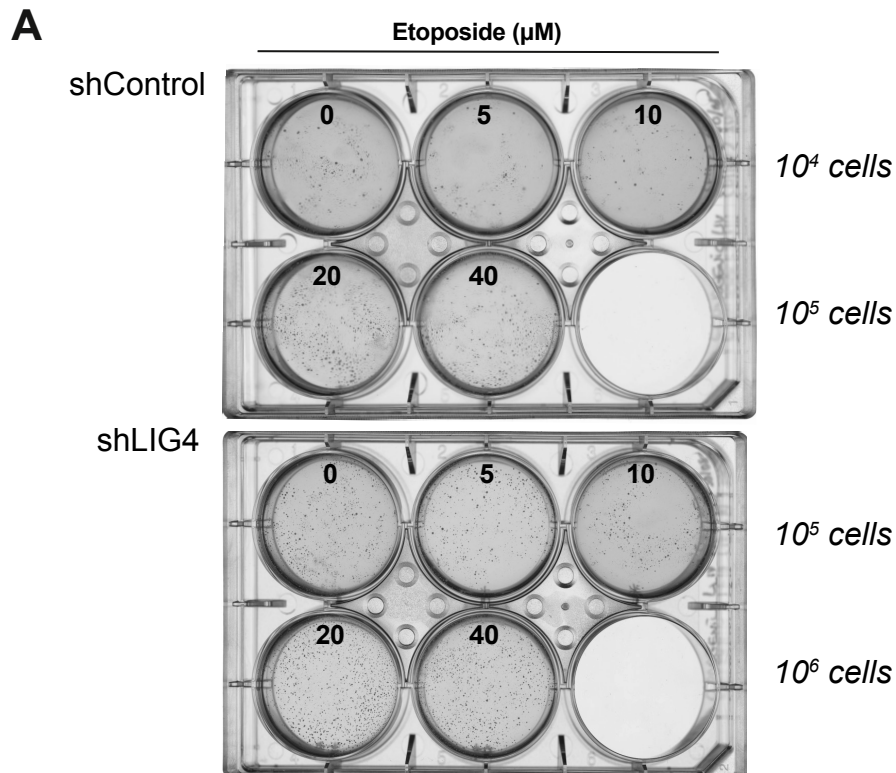

**B**

|           | 0   | 10  | 20   | 40   | Replicate |
|-----------|-----|-----|------|------|-----------|
| shControl | 315 | 276 | 131  | 72   | 1         |
|           | 222 | 107 | 55,3 | 35   | 2         |
|           | 227 | 70  | 51,8 | 30   | 3         |
|           | 117 | 50  | 35,3 | 19,7 | 4         |
| shLIG4    | 155 | 86  | 40   | 6    | 1         |
|           | 78  | 19  | 14,5 | 8,4  | 2         |
|           | 32  | 15  | 3,7  | 2,3  | 3         |
|           | 341 | 164 | 57,4 | 43,4 | 4         |

**Figure S10.** LIG4 promotes survival following TOP2-induced DSBs. Clonogenic survival of KG1a shRNA LIG4 and control cells treated with the indicated concentration of etoposide for 3 h. **(A)** Representative images of cultures. The starting number of cells is indicated. **(B)** Colony counts of four independent experiments (corrected by the starting number of colonies).

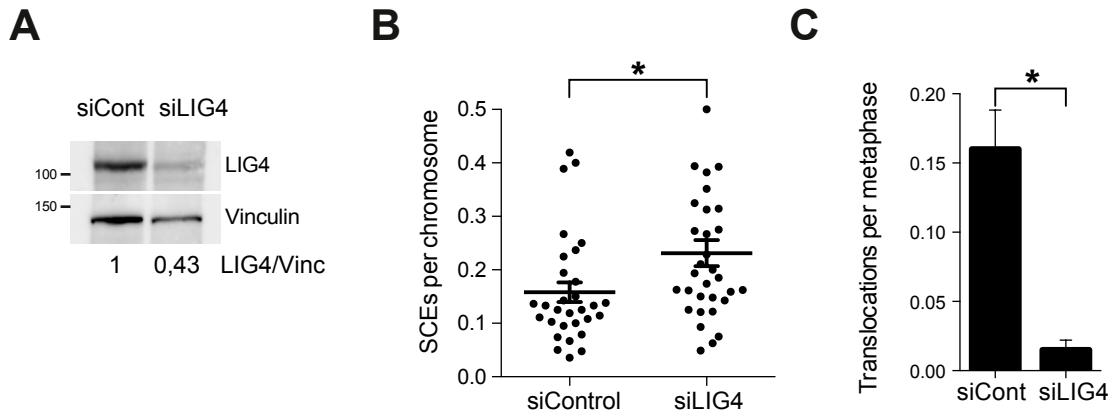

**Figure S11.** LIG4 promotes TOP2-induced chromosomal translocations. **(A)** Analysis of LIG4 protein level 48 h after Control or LIG4 siRNA transfection. Molecular weight markers are in kDa. bottom, LIG4 signal normalized with respect to Vinculin. LIG4 protein relative to the control cells (siControl). **(B)** Sister chromatid exchanges of RPE-1 siControl or siLIG4 cells treated with 5  $\mu$ M etoposide for 30 min. After that, cells were washed and cultured in drug-free medium for 8 h, previous to metaphase spread preparation. Data are mean ( $\pm$  s.e.m.) of SCE events per chromosome per metaphase from two independent experiments. Statistical significance was determined by T-test ( $*P < 0.05$ ). **(C)** Translocation frequencies (translocations per metaphase) in chromosome 8 and 11 were quantified in asynchronous RPE-1 siControl or siLIG4 cells 24 h after etoposide treatment (1 h, 25  $\mu$ M). Mean ( $\pm$  s.e.m.) from three independent experiments. Statistical significance was determined by t-test ( $*P < 0.5$ ).

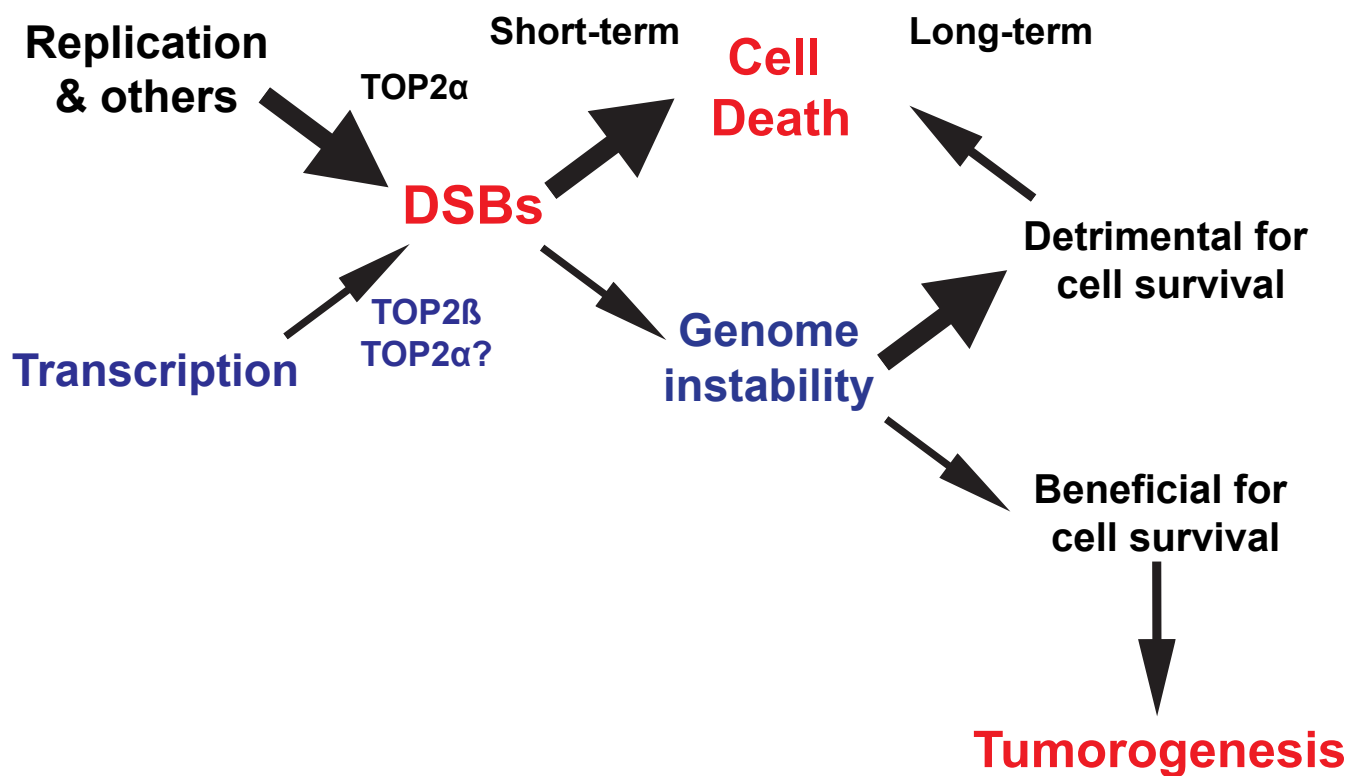

**Figure S12.** Model depicting the effect of TOP2 induced DSBs in cell death and tumorigenesis.

WB Figure 1A

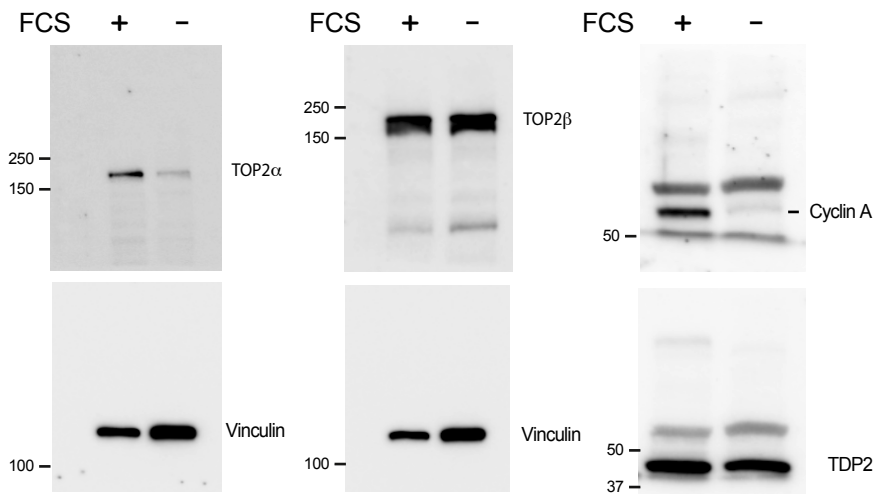

Slot blots Figure 1B

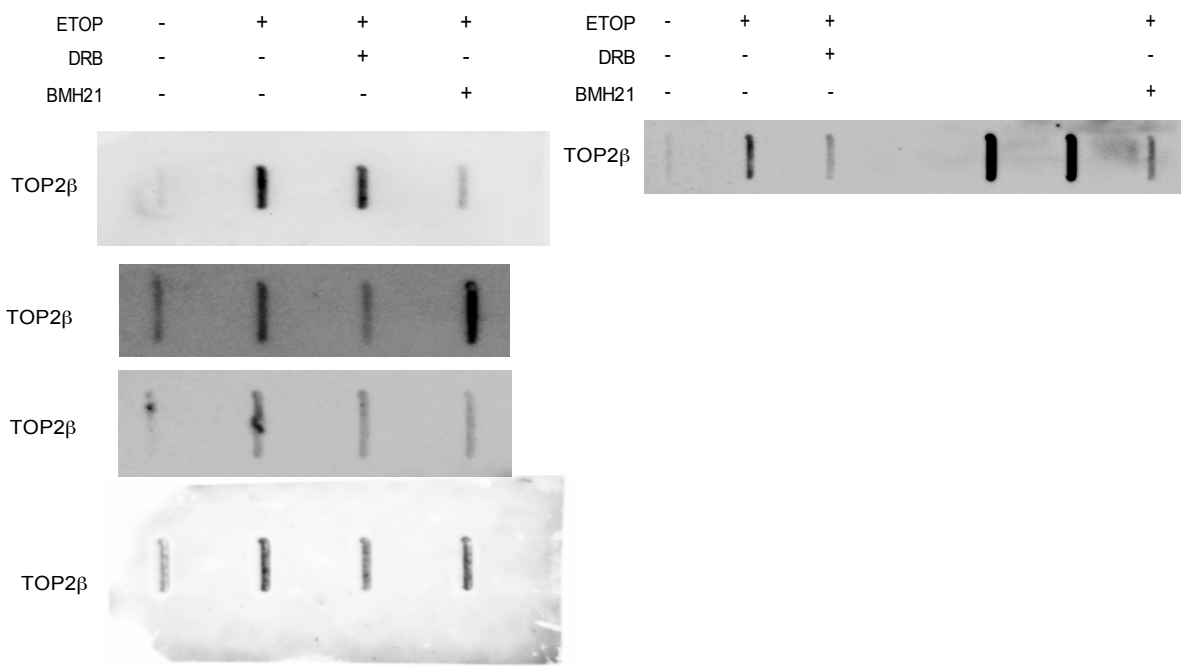

WB Figure 1F

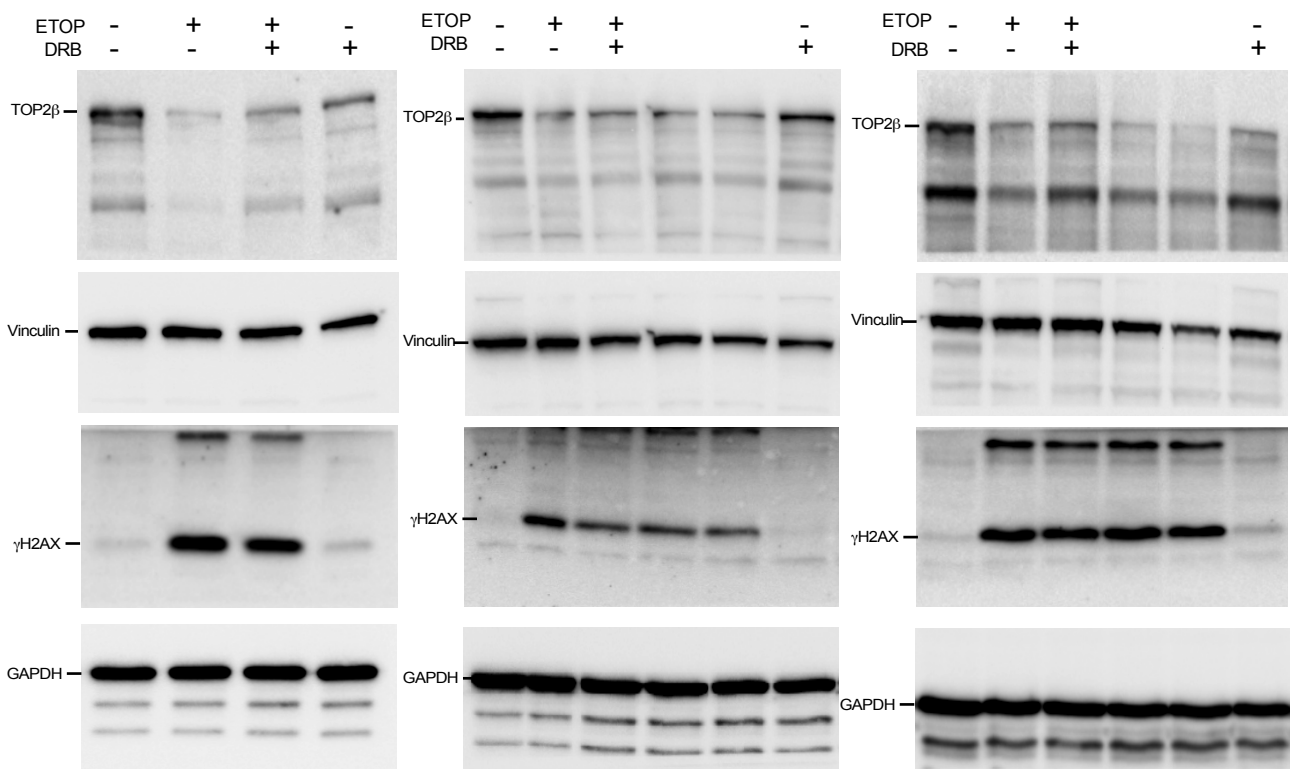

Figure S13\_1. Full blots

Slot blots Figure 2A

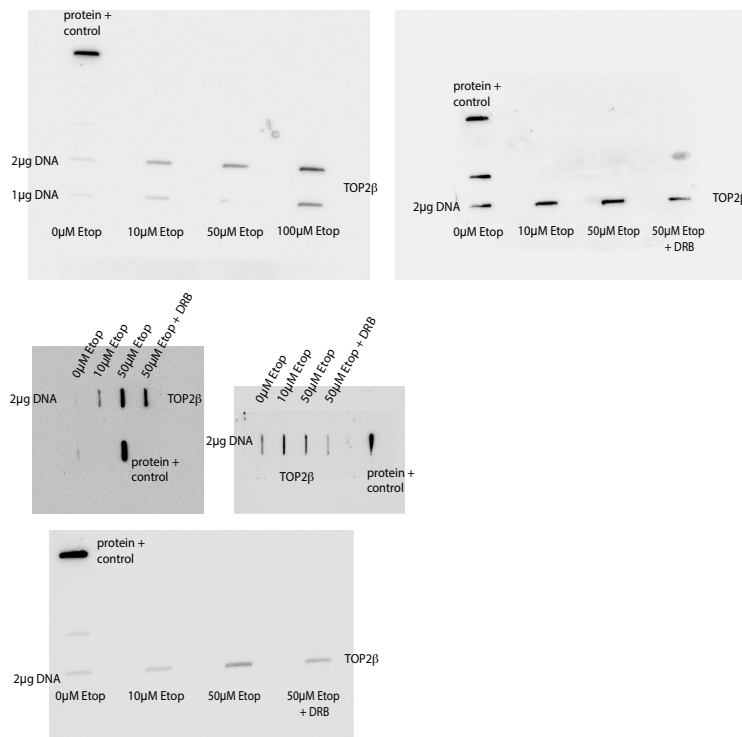

WB Figure 2B

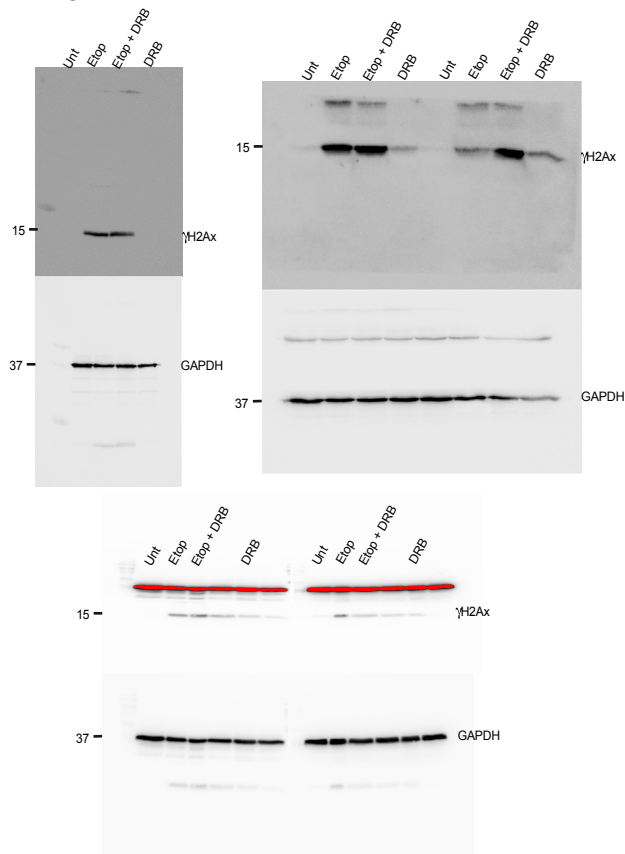

WB Figure 3C

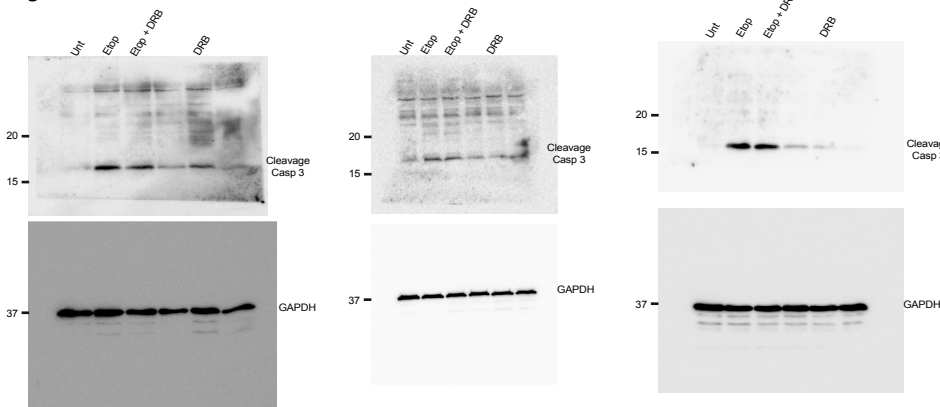

WB Figure 5E

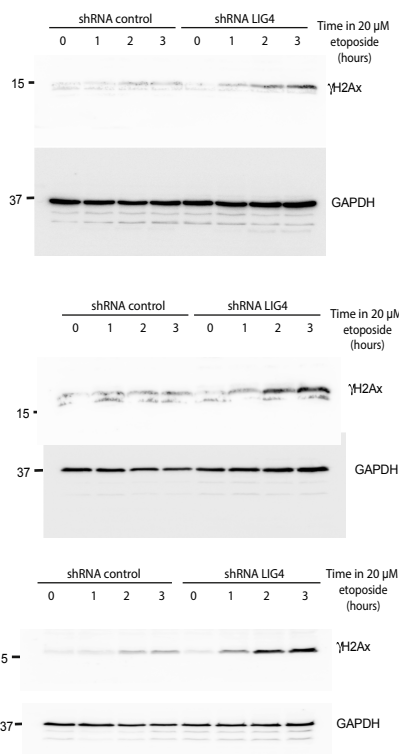

WB Figure S4B

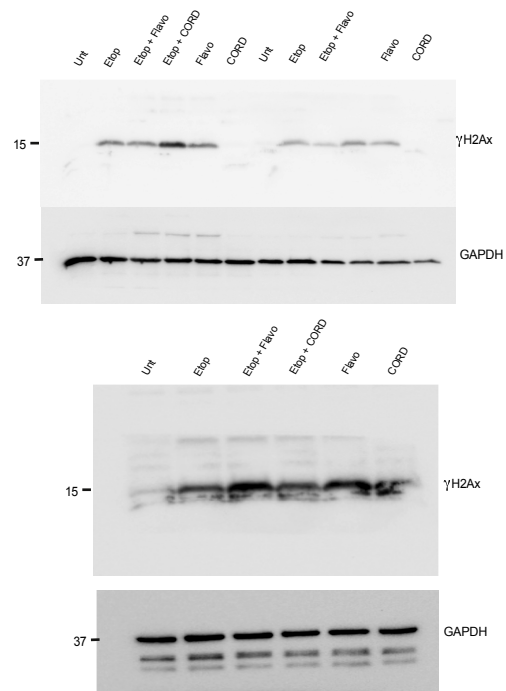

WB Figure 5D

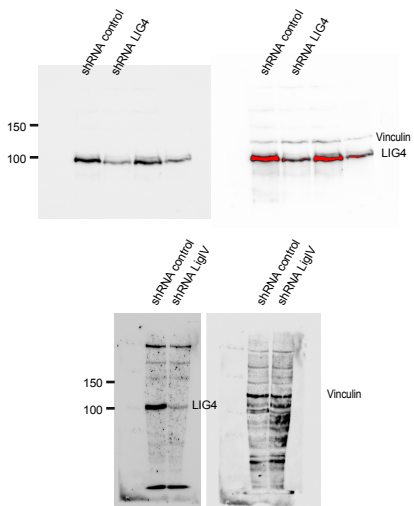

Figure S13\_2. Full blots
